# Supplementary material for: Encapsulation of discrete (H2O)12 clusters in a 3D three-fold interpenetrating metal–organic framework host with (3,4)-connected topology
Source: Royal Society of Chemistry journal article supplement (doi:10.1039/c0dt00302f), 2010-01-01
Supplement: c0dt00302f.pdf [file c0dt00302f.pdf]

## Encapsulation of discrete (H<sub>2</sub>O)<sub>12</sub> clusters in a 3-D three-fold interpenetrating metal-organic framework host with (3,4)-connected topology

Xiuli Wang,\* Hongyan Lin, Bao Mu, Aixiang Tian and Guocheng Liu

<sup>a</sup> Faculty of Chemistry and Chemical Engineering, Bohai University, Jinzhou, 121000, P.R. China

### ELECTRONIC SUPPLEMENTARY INFORMATION

#### Experimental Section

##### Materials and instrumentation

Ligand **L** was synthesized by the literature method.<sup>1</sup> H<sub>3</sub>BTC was commercially obtained from Aldrich and used without further purification. All other reagents were of reagent grade. FT-IR spectra (KBr pellets) were taken on a Magna FT-IR 560 spectrometer and the elemental analyses (C, H, and N) were carried out on a Perkin-Elmer 2400C elemental analyzer. Powder XRD investigations were carried out on a Bruker AXS D8-Advanced diffractometer at 40 kV, 40 mA with Cu K $\alpha$  ( $\lambda = 1.5406 \text{ \AA}$ ) radiation. The electrochemical experiments were carried out using a CHI 440 Electrochemical Quartz Crystal Microbalance. A conventional three-electrode cell was used at room temperature. The modified electrode was used as working electrode. A SCE and a platinum wire were used as reference and auxiliary electrodes, respectively.

Preparation of the title complex **1** modified carbon paste electrode (**1**-CPE): The **1**-CPE was fabricated as follows: 0.25 g graphite powder and 0.015 g complex **1** were mixed and ground together by agate mortar and pestle for approximately 20 min to achieve an even, dry mixture; to the mixture 0.08 ml paraffin oil was added and stirred with a glass rod; then the homogenized mixture was used to pack 2 mm inner diameter glass tubes to a length of 0.5 cm. The electrical contact was established with the copper stick, and the surface of the **1**-CPE was wiped with weighing paper. The same procedure was used for preparation of bare CPE without title complex.

Crystallographic data for **1** was collected at 293(2) K on a Bruker Smart 1000 CCD diffractometer with Mo K $\alpha$  ( $\lambda = 0.71073 \text{ \AA}$ ) by  $\omega$  scan mode. The structure was solved by direct methods using the SHELXS program of the SHELXTL package and refined by full-matrix least-squares methods with SHELXL. Metal atoms in the complex were located from the *E*-maps, and other non-hydrogen atoms were located from successive difference Fourier maps and refined with anisotropic thermal parameters on *F*<sup>2</sup>. The hydrogen atoms of the ligand were generated theoretically onto the specific atoms and refined isotropically with fixed thermal factors.

1 M. Sarkar and K. Biradha, *Cryst. Growth. Des.*, 2006, **6**, 202.

A summary of crystal data and structure refinement for complex **1** is provided in **Table S1**. Selected bond lengths and angles are listed in **Table S2**. Crystallographic data (excluding structure factors) for the structure reported in this paper have been deposited with the Cambridge Crystallographic Data Center as supplementary publication number CCDC 724742.

**Table S1.** Crystal data and structure refinement summary for complex **1**

|                                                     |                                                                                 |
|-----------------------------------------------------|---------------------------------------------------------------------------------|
| Empirical formula                                   | C <sub>72</sub> H <sub>56</sub> Cu <sub>3</sub> N <sub>12</sub> O <sub>22</sub> |
| Formula weight                                      | 1631.91                                                                         |
| Temperature (K)                                     | 150(2)                                                                          |
| Crystal system                                      | Trigonal                                                                        |
| Space group                                         | R-3                                                                             |
| <i>a</i> (Å)                                        | 18.5636(3)                                                                      |
| <i>b</i> (Å)                                        | 18.5636(3)                                                                      |
| <i>c</i> (Å)                                        | 19.7224(6)                                                                      |
| $\alpha$ (°)                                        | 90                                                                              |
| $\beta$ (°)                                         | 90                                                                              |
| $\gamma$ (°)                                        | 120                                                                             |
| Volume (Å <sup>3</sup> )                            | 5885.9(2)                                                                       |
| <i>Z</i>                                            | 9                                                                               |
| <i>D</i> <sub>calc</sub> (g/cm <sup>3</sup> )       | 1.381                                                                           |
| Absorption coefficient (mm <sup>-1</sup> )          | 0.884                                                                           |
| <i>F</i> (000)                                      | 2504                                                                            |
| Crystal size (mm)                                   | 0.14 x 0.10 x 0.07                                                              |
| $\theta$ range (°)                                  | 1.63–24.97                                                                      |
| Range of <i>h, k, l</i>                             | -22/22, -22/22, -23/23                                                          |
| Reflections collected                               | 18822                                                                           |
| Independent reflections                             | 2299 ( <i>R</i> <sub>int</sub> = 0.0446)                                        |
| Data / restraints / parameters                      | 2299 / 0 / 178                                                                  |
| Goodness-of-fit on <i>F</i> <sup>2</sup>            | 1.181                                                                           |
| Final <i>R</i> indices [ <i>I</i> > 2σ( <i>I</i> )] | <i>R</i> <sup>a</sup> = 0.0348, <i>wR</i> <sup>b</sup> = 0.0992                 |
| <i>R</i> indices (all data)                         | <i>R</i> <sup>a</sup> = 0.0430, <i>wR</i> <sup>b</sup> = 0.1143                 |
| Largest diff. peak and hole (e Å <sup>-3</sup> )    | 0.831 and -0.312                                                                |

---

$$^a R_1 = \frac{\sum ||F_o| - |F_c||}{\sum |F_o|}; \quad ^b wR_2 = \frac{\sum [w(F_o^2 - F_c^2)^2]}{\sum [w(F_o^2)^2]}^{1/2}.$$

**Table S2.** Selected bond distances (Å) and angles (deg) for complex **1**

|                   |            |                     |            |
|-------------------|------------|---------------------|------------|
| Cu(1)–O(1)        | 1.9263(17) | Cu(1)–O(1)#1        | 1.9263(17) |
| Cu(1)–N(1)        | 2.013(2)   | Cu(1)–N(1)#1        | 2.012(2)   |
| O(1)#1–Cu(1)–O(1) | 180.00(2)  | O(1)#1–Cu(1)–N(1)#1 | 90.08(8)   |
| O(1)–Cu(1)–N(1)#1 | 89.92(8)   | O(1)#1–Cu(1)–N(1)   | 89.92(8)   |
| O(1)–Cu(1)–N(1)   | 90.08(8)   | N(1)#1–Cu(1)–N(1)   | 180.00(2)  |

Symmetry code for #1:  $-x+1, -y, -z+1$ .

**Table S3.** Hydrogen-bonded geometry (Å, °) for complex **1**

| D–H···A                           | D–H     | H···A   | D···A   | D–H···A |
|-----------------------------------|---------|---------|---------|---------|
| O(2W)–H(2WB)···O(2W) <sup>a</sup> | 0.85(2) | 2.01(2) | 2.85(3) | 174(10) |
| O(1W)–H(1WB)···O(1W) <sup>b</sup> | 0.85(2) | 2.15(2) | 2.57(2) | 110(10) |
| O(2W)–H(2WA)···O(1W) <sup>c</sup> | 0.85(2) | 2.16(2) | 2.96(2) | 158(9)  |

Symmetry code for (a)  $-2/3+x, -1/3+y, -4/3+z$  (b)  $-1/3+x-y, -2/3+x, 1/3-z$  (c)  $1/3-y, -1/3+x-y, -4/3+z$ .

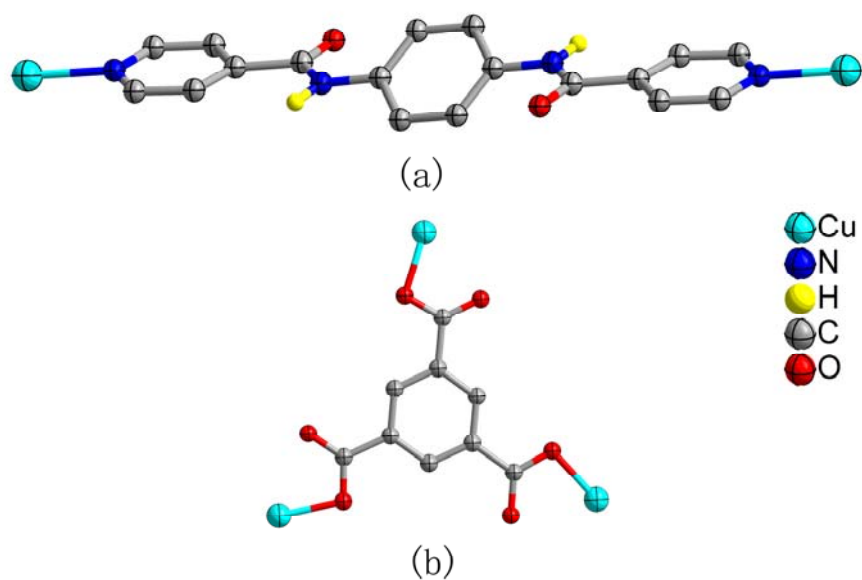

**Fig. S1.** Coordination mode of L ligand and BTC ligand.

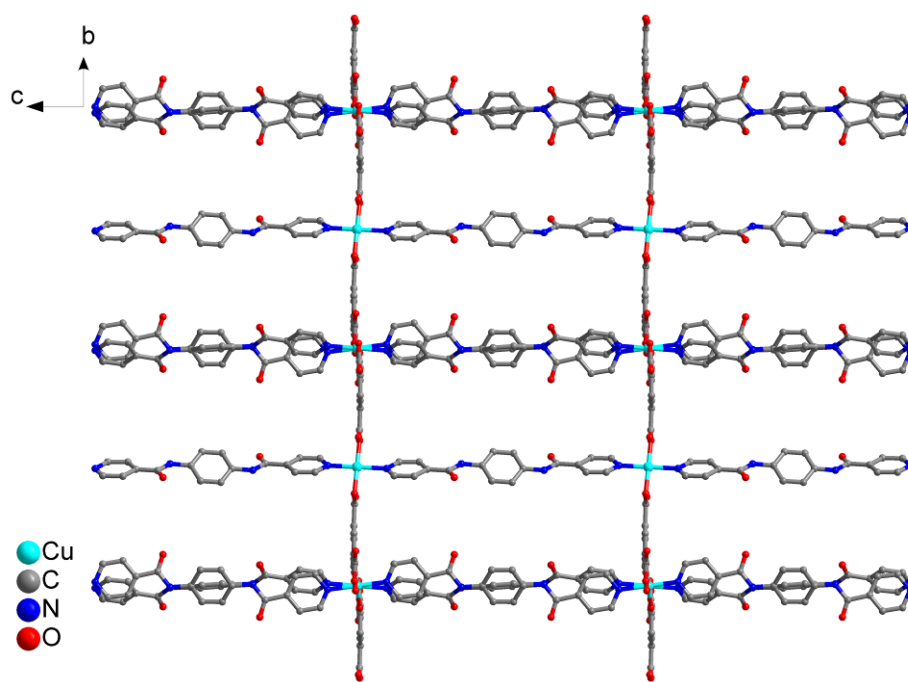

(a)

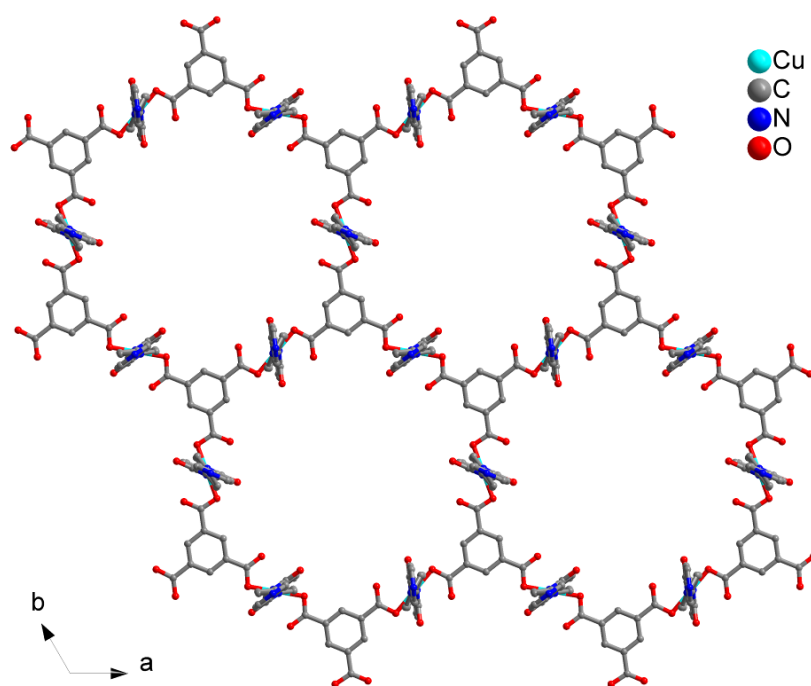

(b)

**Fig. S2.** Ball-and-stick representation of the 3-D metal-organic framework of complex 1: along a-axis (a) and along c-axis (b). All H atoms and lattice water molecules have been omitted for clarity.

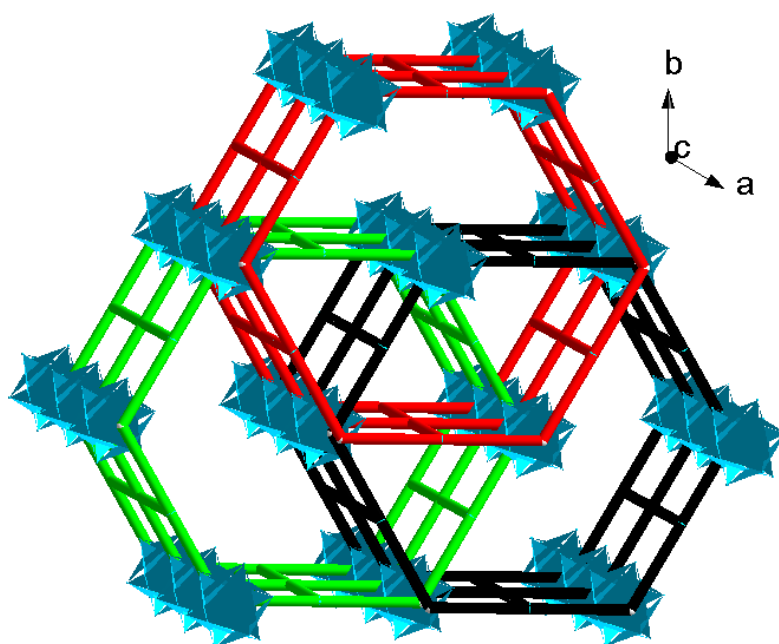

**Fig. S3.** View of three-fold interpenetrating 3D metal-organic framework in **1** along the c-axis. Stick representation of the hexagon-like channels based on 3D metal-organic framework  $[\text{Cu}_3(\text{L})_3(\text{BTC})_2]_{3n}$ , encapsulating  $(\text{H}_2\text{O})_{12}$  water clusters shown in a polyhedral representation.

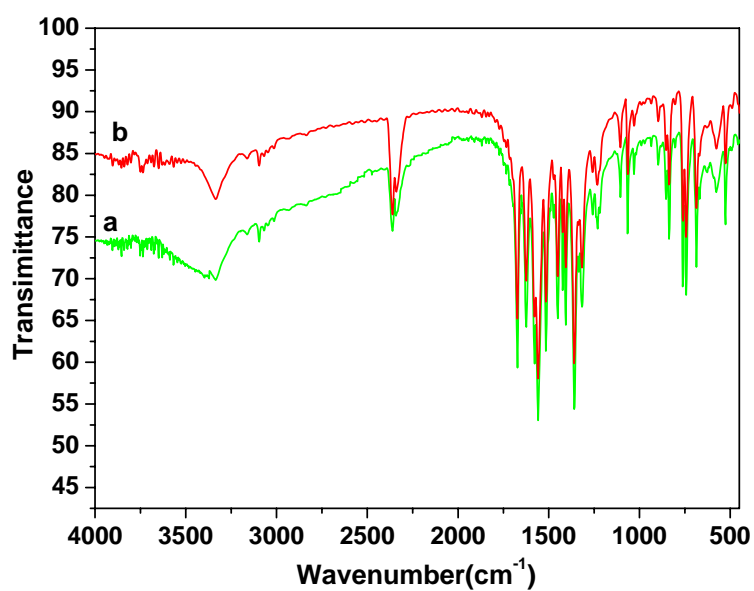

**Fig. S4.** The IR spectra of complex **1**. (a) Crystal sample containing water clusters, (b) Crystal sample without water clusters.

The FT-IR spectra of complex **1** show a strong band with two peaks at around 3396 and 3325  $\text{cm}^{-1}$  (curve a), which should be assigned to the vibrations of hydroxyl groups. When the solid samples were heated in vacuum at 200 °C for 2 h, the peak at 3396  $\text{cm}^{-1}$  vanished (curve b). As reported, the stretching vibrations of O–H are found to be size specific, spreading over a wide range from 3720 to 2935  $\text{cm}^{-1}$ , with the larger nuclear clusters exhibiting the O–H vibration below 3400  $\text{cm}^{-1}$  and which shifts with increasing ring size to smaller values.<sup>2</sup> Therefore, the peak at 3396  $\text{cm}^{-1}$  in the IR spectra can be regarded as the O–H vibration in the water clusters with six-membered rings and its vanishing can be attributed to the lose of water molecules.

The IR spectra display the typical stretching bands of carboxylate groups between 1300 and 1660  $\text{cm}^{-1}$ , a very strong band appears at around 1625  $\text{cm}^{-1}$  due to the asymmetric stretching ( $\nu_{\text{as}}$ ) of the carboxylate group; the symmetrical stretching ( $\nu_{\text{s}}$ ) band of this group appears at 1480–1670 and 1350–1455  $\text{cm}^{-1}$ , respectively.<sup>3</sup> No strong absorption peaks around 1700  $\text{cm}^{-1}$  for –COOH are observed, indicating that carboxyl groups of organic moieties in **1** are completely deprotonated.<sup>3</sup> The bands at about 1556, 1480, 1064, and 705  $\text{cm}^{-1}$  may be attributed to the  $\nu_{\text{C-N}}$  stretching of the pyridyl ring. Weak absorptions observed at 3010–3170  $\text{cm}^{-1}$  for **1** can be attributed to the  $\nu_{\text{C-H}}$  stretching bands.

- 2 (a) M. Mascal, L. Infantes and J. Chisholm, *Angew. Chem., Int. Ed.*, 2006, **45**, 32; (b) J. W. Shin, N. I. Hammer, E. G. Diken, M. A. Johnson, R. S. Walters, T. D. Jaeger, M. A. Duncan, R. A. Christie and K. D. Jordan, *Science*, 2004, **304**, 1137.
- 3 (a) S. N. Wang, J. F. Bai, H. Xing, Y. Z. Li, Y. Song, Y. Pan, M. Scheer, X. Z. You, *Cryst. Growth. Des.*, 2007, **7**, 745; (b) A. H. Yang, H. Zhang, H. L. Gao, W. Q. Zhang, L. He, J. Z. Cui, *Cryst. Growth. Des.*, 2008, **8**, 3354.
- 4 (a) X. J. Gu and D. F. Xue, *Cryst. Growth. Des.*, 2006, **6**, 2551; (b) L. J. Bellamy, *The Infrared Spectra of Complex Molecules*; Wiley, New York, 1958.

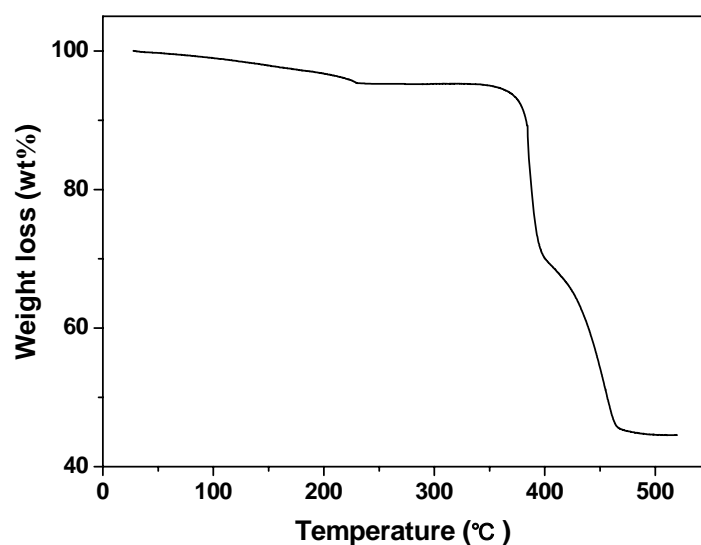

Fig. S5 TG curve for complex **1**.

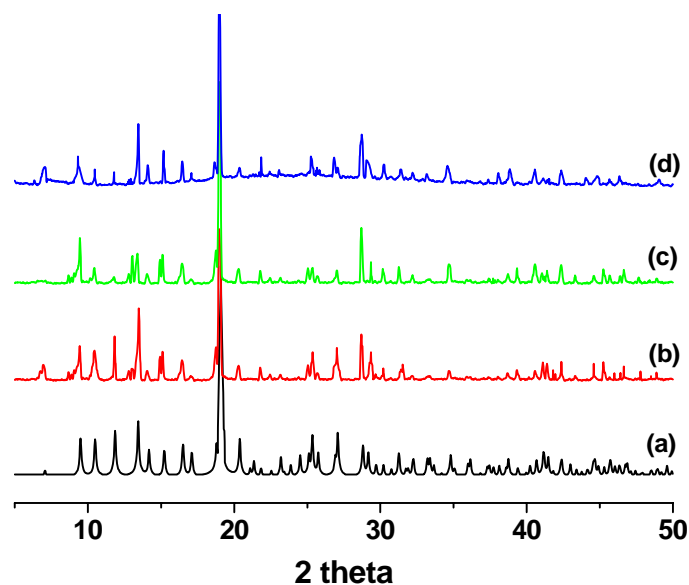

**Fig. S6** XRD patterns: (a) simulated from single-crystal X-ray data; (b) as-synthesized complex  $[\text{Cu}_3(\text{L})_3(\text{BTC})_2]_3 \cdot 12\text{H}_2\text{O}$  (**1**); (c) taken after heating at 200 °C under vacuum for 2 h; (d) after rehydration of sample for 24 h.

The powder X-ray diffraction pattern of an as-synthesized crystal of **1** was almost identical to that calculated from the single-crystal structure. The XRD of crystals **1** heated to 200 °C under vacuum for 2 h revealed that lattice water molecules in the structure were completely removed and the chemical composition of the powder is  $[\text{Cu}_3(\text{L})_3(\text{BTC})_2]_3$ . When the sample **1** was immersed in water for 24 h, the original framework is recovered as indicated by the similar XRD curve to that of the fresh one.

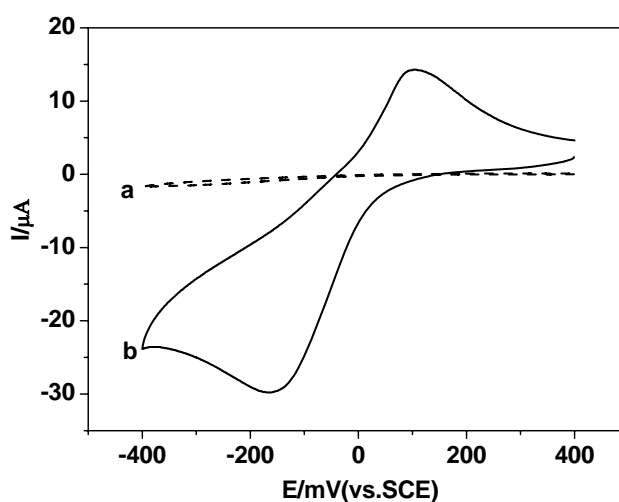

**Fig. S7.** Cyclic voltammograms of (a) the bare CPE and (b) **1**-CPE in 0.1 M pH 2.5 phosphates buffer solution in the potential range of 400 – -400 mV. Scan rate: 50  $\text{mVs}^{-1}$ .

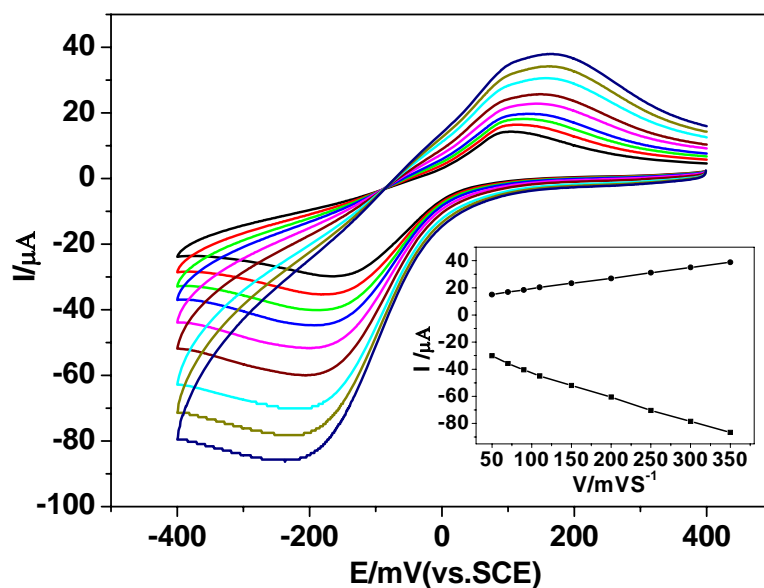

**Fig. S8.** Cyclic voltammograms of **1-CPE** in pH 2.5 phosphate buffer solution at different scan rates (from inner to outer) 50, 70, 90, 110, 150, 200, 250, 300, and 350  $\text{mV s}^{-1}$  of **1-CPE**. The inset shows the plots of the anodic and the cathodic peak currents vs. scan rates.

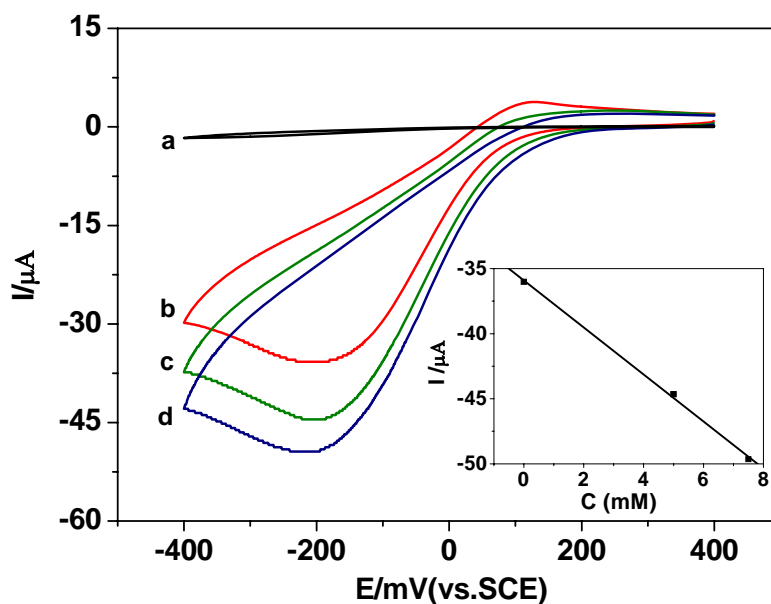

**Fig. S9.** Cyclic voltammograms of a bare CPE in phosphate buffer solution with pH of 2 containing 5 mM  $\text{NaNO}_2$  (a) and **1-CPE** in phosphate buffer solution containing  $\text{NO}_2^-$  concentrations of 0.0 (b), 5.0 (c) and 7.5 (d) mM. Scan rate: 50  $\text{mVs}^{-1}$ . Inset: the variation of cathodic peak currents vs. nitrite concentrations.
